# Supplementary material
Source: PubMed Central journal article supplement (PMC4103420)
Supplement: NIHMS572772-supplement-Supplement.pdf [file NIHMS572772-supplement-Supplement.pdf]

Supplementary Table 1

| <u>Race</u>             | <u>Region</u>                 | <u>Country</u>                         | <u>Number</u> | <u>% of total</u> |
|-------------------------|-------------------------------|----------------------------------------|---------------|-------------------|
| <u>White /Caucasian</u> | <u>Australia /New Zealand</u> | <u>Australian</u>                      | <u>81</u>     | <u>12.6%</u>      |
|                         |                               | <u>New Zealander</u>                   | <u>13</u>     | <u>2.0%</u>       |
|                         | <u>Europe</u>                 | <u>Austrian</u>                        | <u>19</u>     | <u>3.0%</u>       |
|                         |                               | <u>Bosnian</u>                         | <u>3</u>      | <u>0.5%</u>       |
|                         |                               | <u>British, no further designation</u> | <u>15</u>     | <u>2.3%</u>       |
|                         |                               | <u>Czech</u>                           | <u>16</u>     | <u>2.5%</u>       |
|                         |                               | <u>Dutch</u>                           | <u>1</u>      | <u>0.2%</u>       |
|                         |                               | <u>English</u>                         | <u>20</u>     | <u>3.1%</u>       |
|                         |                               | <u>Estonian</u>                        | <u>1</u>      | <u>0.2%</u>       |
|                         |                               | <u>German</u>                          | <u>60</u>     | <u>9.3%</u>       |
|                         |                               | <u>Hungarian</u>                       | <u>6</u>      | <u>0.9%</u>       |
|                         |                               | <u>Italian</u>                         | <u>3</u>      | <u>0.5%</u>       |
|                         |                               | <u>Latvian</u>                         | <u>2</u>      | <u>0.3%</u>       |
|                         |                               | <u>Lithuanian</u>                      | <u>4</u>      | <u>0.6%</u>       |
|                         |                               | <u>Maltese</u>                         | <u>1</u>      | <u>0.2%</u>       |
|                         |                               | <u>Polish</u>                          | <u>100</u>    | <u>15.5%</u>      |
|                         |                               | <u>Portuguese</u>                      | <u>6</u>      | <u>0.9%</u>       |
|                         |                               | <u>Romanian</u>                        | <u>2</u>      | <u>0.3%</u>       |
|                         |                               | <u>Russian</u>                         | <u>1</u>      | <u>0.2%</u>       |
|                         |                               | <u>Scottish</u>                        | <u>4</u>      | <u>0.6%</u>       |
|                         |                               | <u>Serbian</u>                         | <u>4</u>      | <u>0.6%</u>       |
|                         |                               | <u>Slovene</u>                         | <u>14</u>     | <u>2.2%</u>       |
|                         |                               | <u>Spanish</u>                         | <u>31</u>     | <u>4.8%</u>       |
|                         |                               | <u>Swedish</u>                         | <u>5</u>      | <u>0.8%</u>       |
|                         | <u>North America</u>          | <u>American Caucasian</u>              | <u>168</u>    | <u>26.1%</u>      |
|                         |                               | <u>Canadian</u>                        | <u>25</u>     | <u>3.9%</u>       |
|                         | <u>Other</u>                  | <u>South African</u>                   | <u>1</u>      | <u>0.2%</u>       |
| <u>Not Caucasian</u>    | <u>East Asian</u>             | <u>Filipino</u>                        | <u>36</u>     | <u>5.6%</u>       |
|                         |                               | <u>Chinese</u>                         | <u>2</u>      | <u>0.3%</u>       |

Supplementary Table 2

HLA-DQA1 and DQB1 Nomenclature based on second exon polymorphism only

| <u>Designation</u> | <u>Allele Group</u>            |
|--------------------|--------------------------------|
| <u>DQA1*0101g</u>  | <u>DQA1*0101, *0104, *0105</u> |
| <u>DQA1*0301g</u>  | <u>DQA1*0301, *0302, *0303</u> |
| <u>DQA1*0401g</u>  | <u>DQA1*0401, *0402, *0403</u> |
| <u>DQA1*0501g</u>  | <u>DQA1*0501, *0503, *0505</u> |
| <u>DQB1*0301g</u>  | <u>DQB1*0301, *0309</u>        |
| <u>DRB1*0602g</u>  | <u>DQB1*0602, *06011</u>       |
| <u>DQB1*0603g</u>  | <u>DQB1*0603, *0614</u>        |

Supplementary Table 3 HLA-DR-DQ Diplotype Risk

| <u>DRB1</u> | <u>DQB1</u> | <u>DRB1</u> | <u>DQB1</u> | <u>Controls</u> |              | <u>T1D</u> |               | <u>Odds Ratio</u> | <u>95%</u>   | <u>C.I:</u>    |
|-------------|-------------|-------------|-------------|-----------------|--------------|------------|---------------|-------------------|--------------|----------------|
|             |             |             |             | <u>n*</u>       | <u>%</u>     | <u>N</u>   | <u>%</u>      |                   |              |                |
| <u>0301</u> | <u>0201</u> | <u>0405</u> | <u>0302</u> | <u>0.3</u>      | <u>0.06%</u> | <u>16</u>  | <u>2.64%</u>  | <u>49.22</u>      | <u>0.95</u>  | <u>2551.55</u> |
| <u>0401</u> | <u>0302</u> | <u>0401</u> | <u>0302</u> | <u>0.7</u>      | <u>0.15%</u> | <u>35</u>  | <u>5.78%</u>  | <u>41.37</u>      | <u>3.70</u>  | <u>463.01</u>  |
| <u>0301</u> | <u>0201</u> | <u>0401</u> | <u>0302</u> | <u>4.4</u>      | <u>0.96%</u> | <u>157</u> | <u>25.91%</u> | <u>35.94</u>      | <u>13.79</u> | <u>93.67</u>   |
| <u>0301</u> | <u>0201</u> | <u>0402</u> | <u>0302</u> | <u>1.1</u>      | <u>0.25%</u> | <u>29</u>  | <u>4.79%</u>  | <u>20.23</u>      | <u>3.07</u>  | <u>133.32</u>  |
| <u>0801</u> | <u>0402</u> | <u>0401</u> | <u>0302</u> | <u>0.8</u>      | <u>0.18%</u> | <u>14</u>  | <u>2.31%</u>  | <u>13.30</u>      | <u>1.41</u>  | <u>125.70</u>  |
| <u>0301</u> | <u>0201</u> | <u>0404</u> | <u>0302</u> | <u>3.8</u>      | <u>0.83%</u> | <u>37</u>  | <u>6.11%</u>  | <u>7.81</u>       | <u>2.68</u>  | <u>22.72</u>   |
| <u>0101</u> | <u>0501</u> | <u>0401</u> | <u>0302</u> | <u>3.1</u>      | <u>0.68%</u> | <u>28</u>  | <u>4.62%</u>  | <u>7.03</u>       | <u>2.17</u>  | <u>22.80</u>   |
| <u>0401</u> | <u>0302</u> | <u>1302</u> | <u>0604</u> | <u>1.0</u>      | <u>0.21%</u> | <u>8</u>   | <u>1.32%</u>  | <u>6.32</u>       | <u>0.76</u>  | <u>52.58</u>   |
| <u>0401</u> | <u>0302</u> | <u>0404</u> | <u>0302</u> | <u>1.2</u>      | <u>0.25%</u> | <u>9</u>   | <u>1.49%</u>  | <u>5.93</u>       | <u>0.85</u>  | <u>41.34</u>   |
| <u>0901</u> | <u>0303</u> | <u>0401</u> | <u>0302</u> | <u>0.5</u>      | <u>0.12%</u> | <u>4</u>   | <u>0.66%</u>  | <u>5.61</u>       | <u>0.33</u>  | <u>96.73</u>   |
| <u>0301</u> | <u>0201</u> | <u>0301</u> | <u>0201</u> | <u>7.1</u>      | <u>1.57%</u> | <u>46</u>  | <u>7.59%</u>  | <u>5.15</u>       | <u>2.32</u>  | <u>11.44</u>   |
| <u>0101</u> | <u>0501</u> | <u>0402</u> | <u>0302</u> | <u>0.8</u>      | <u>0.18%</u> | <u>4</u>   | <u>0.66%</u>  | <u>3.77</u>       | <u>0.34</u>  | <u>41.62</u>   |
| <u>0801</u> | <u>0402</u> | <u>0404</u> | <u>0302</u> | <u>0.7</u>      | <u>0.15%</u> | <u>2</u>   | <u>0.33%</u>  | <u>2.17</u>       | <u>0.14</u>  | <u>33.51</u>   |
| <u>0301</u> | <u>0201</u> | <u>0901</u> | <u>0303</u> | <u>1.8</u>      | <u>0.39%</u> | <u>4</u>   | <u>0.66%</u>  | <u>1.72</u>       | <u>0.29</u>  | <u>10.17</u>   |
| <u>0301</u> | <u>0201</u> | <u>1302</u> | <u>0604</u> | <u>3.1</u>      | <u>0.69%</u> | <u>6</u>   | <u>0.99%</u>  | <u>1.44</u>       | <u>0.37</u>  | <u>5.69</u>    |
| <u>0101</u> | <u>0501</u> | <u>0404</u> | <u>0302</u> | <u>2.7</u>      | <u>0.59%</u> | <u>2</u>   | <u>0.33%</u>  | <u>0.56</u>       | <u>0.09</u>  | <u>3.52</u>    |

\*n=455 genotypes (estimated from 910 AFBAC haplotypes).

T1D= probands N=606

Selected DR-DQ diplotype risk was estimated for the high risk DR3 and DR4 haplotypes as well as the four DR-DQ haplotypes with ORs > 1.0 in Table 4. ORs have been estimated by comparing the observed frequency of diplotypes among probands with the estimated frequency of control diplotypes, based on observed frequency of AFBAC haplotypes and the assumption of Hardy-Weinberg equilibrium.
